# Supplementary material for: Crystal Structures of Antiarrhythmic Drug Disopyramide and Its Salt with Phthalic Acid
Source: MDPI journal article supplement (doi:10.3390/cryst11040379), 2021-04-06
Supplement: s1 [file s1]

# Crystal Structures of Antiarrhythmic drug Disopyramide and its Salt with Phthalic acid

Majid Ismail Tamboli<sup>1,†</sup>, Yushi Okamoto<sup>1</sup>, Yohei Utusmi<sup>1</sup>, Takayuki Furuishi<sup>1,†</sup>, Siran Wang<sup>1</sup>, Daiki Umeda<sup>1</sup>, Okky Dwichandra Putra<sup>1,\*</sup>, Kaori Fukuzawa<sup>1</sup>, Hidehiro Uekusa<sup>2</sup> and Etsuo Yonemochi<sup>1,\*</sup>

<sup>1</sup> Department of Physical Chemistry, School of Pharmacy and Pharmaceutical Sciences, Hoshi University, 2-4-41 Ebara, Shinagawa-ku, Tokyo, 142-8501, Japan

<sup>2</sup> Department of Chemistry, School of Science, Tokyo Institute of Technology, Tokyo 152-8551, Japan

\* Correspondence: dwichandraputra@yahoo.com; Tel.: +81-3-5498-5148 (O.P.); e-yonemochi@hoshi.ac.jp; Tel.: +81-3-5498-5048 (Y.E.)

† Co-first author, these authors contributed equally to this work.

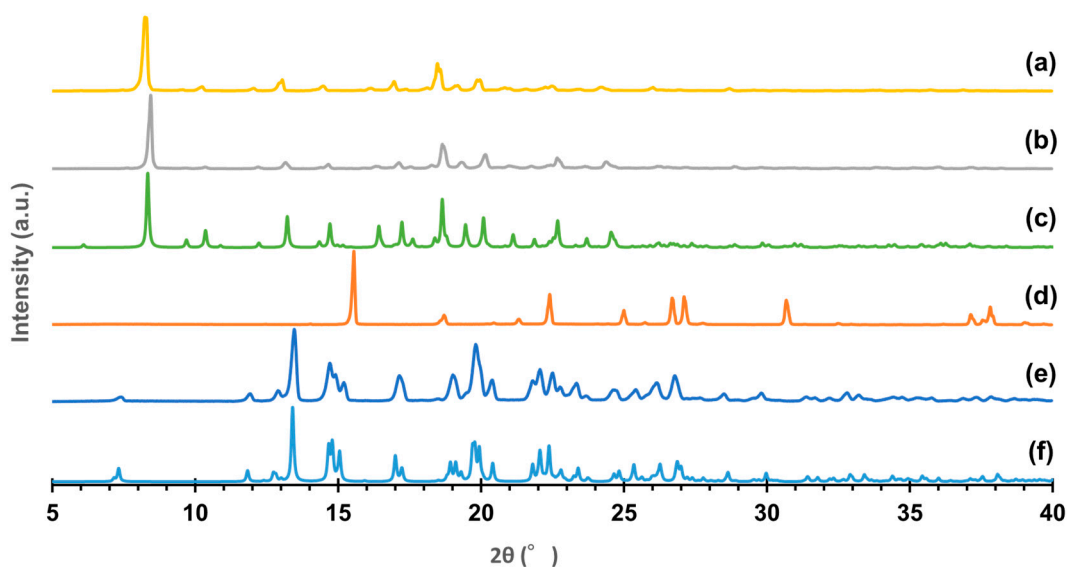

**Figure 1.** PXRD patterns of (a) commercial DPA; (b) DPA crystal, (c) simulated DPA, (d) PA, (e) DPA\_PA salt and (f) simulated DPA\_PA salt.

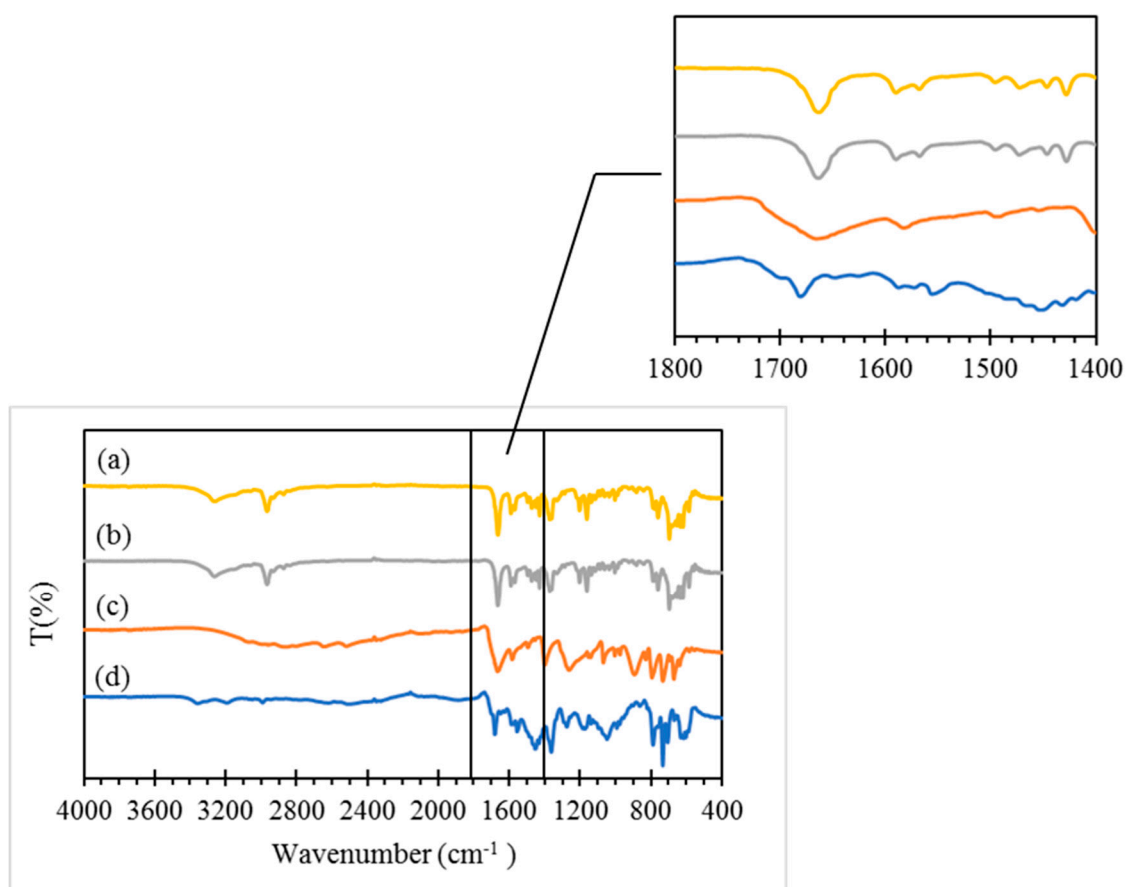

Figure S2. FT-IR spectra of (a) commercial DPA; (b) DPA crystal, (c) PA, (d) DPA\_PA salt.

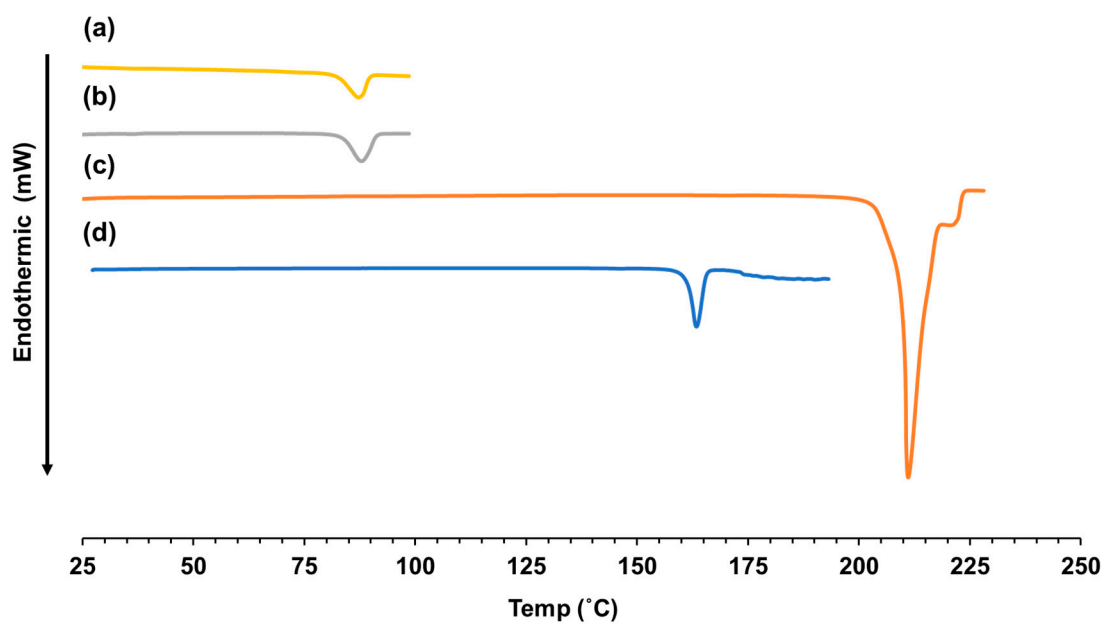

Figure S3. DSC profiles of (a) commercial DPA, (b) DPA crystal, (c) PA, (d) DPA\_PA

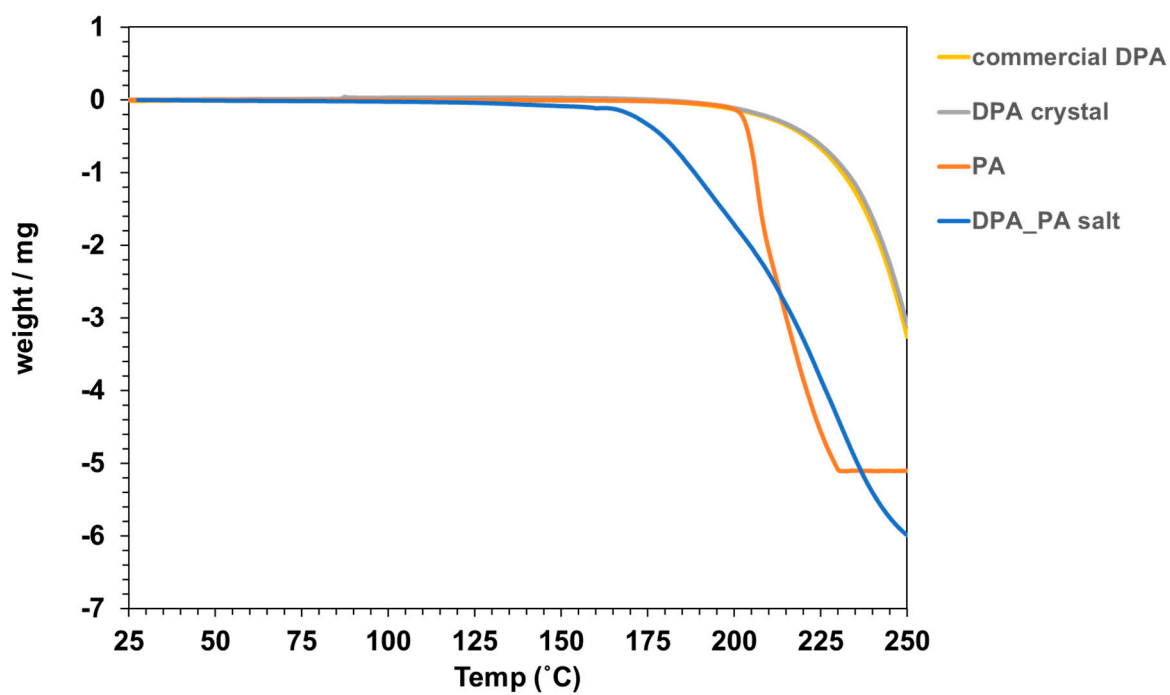

Figure S4. TG curves of commercial DPA (yellow), DPA crystal (gray), PA (orange), DPA\_PA salt (blue)
